# Supplementary material for: A Metastatic Cancer Expression Generator (MetGen): A Generative Contrastive Learning Framework for Metastatic Cancer Generation
Source: MDPI journal article supplement (doi:10.3390/cancers16091653), 2024-04-25
Supplement: s1 [file s1]

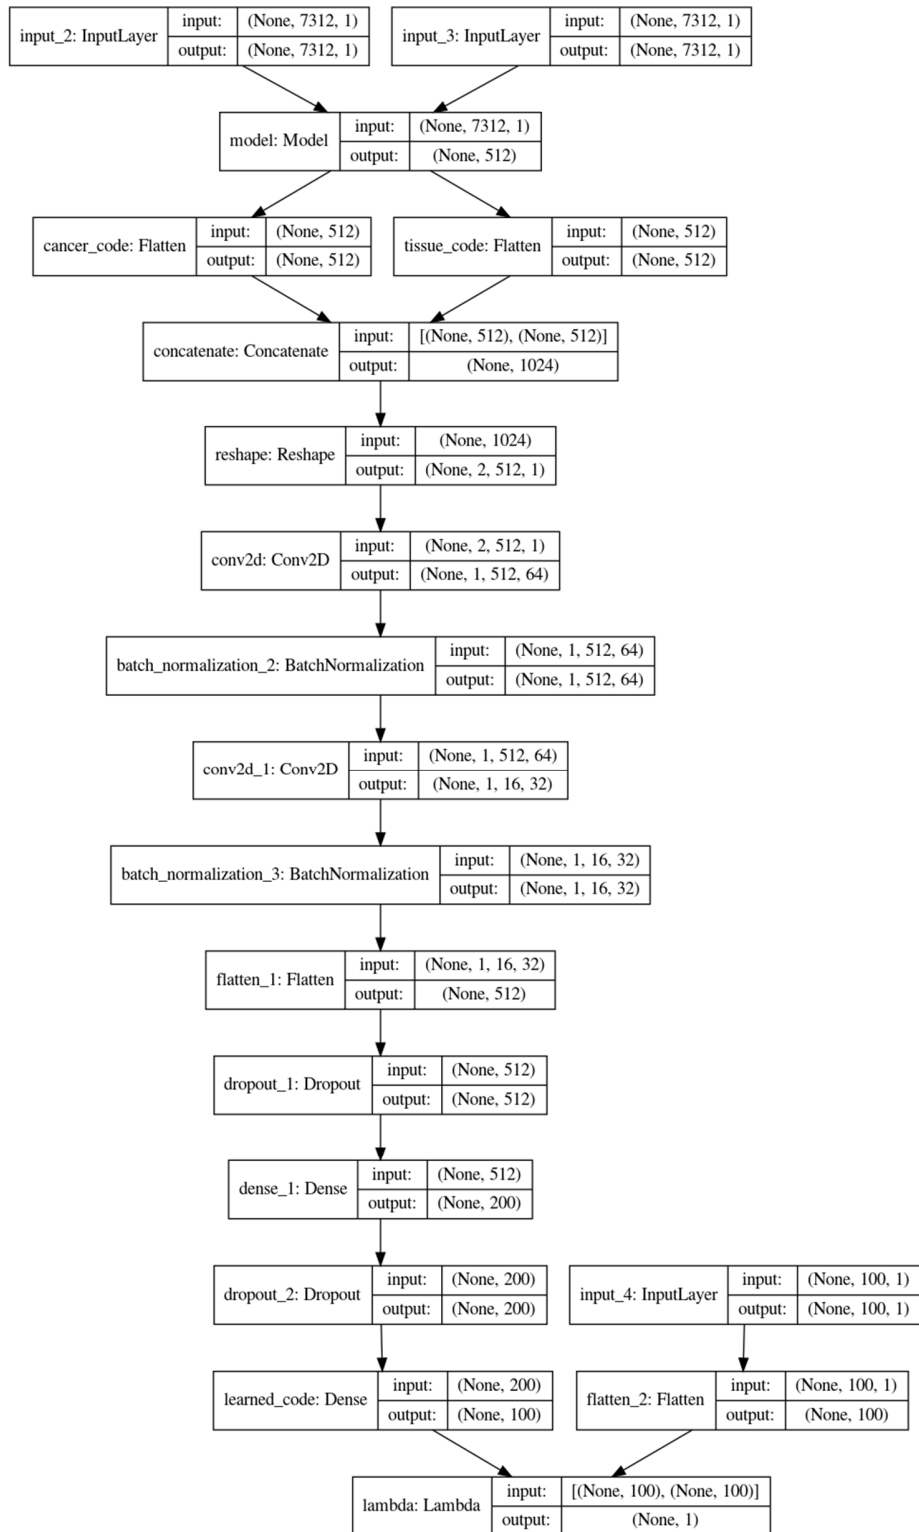

Supplementary Figure S1. Structure of MetGen.

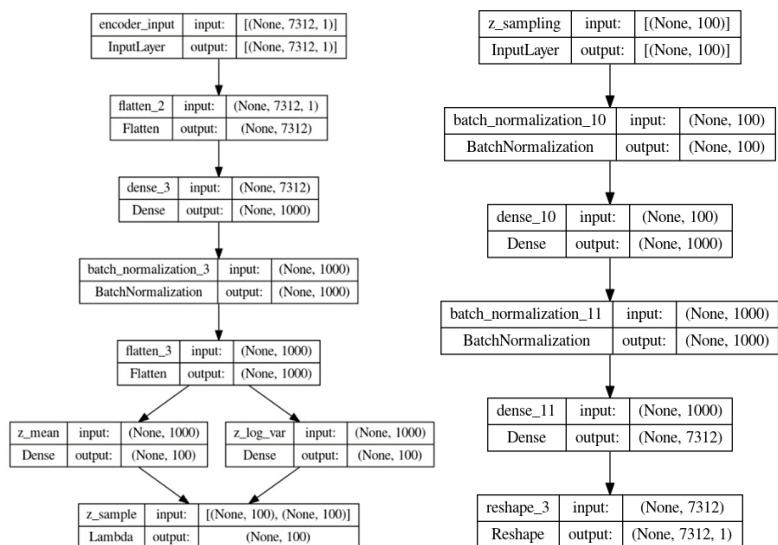

Supplementary Figure S2. Structure of MetVAE.

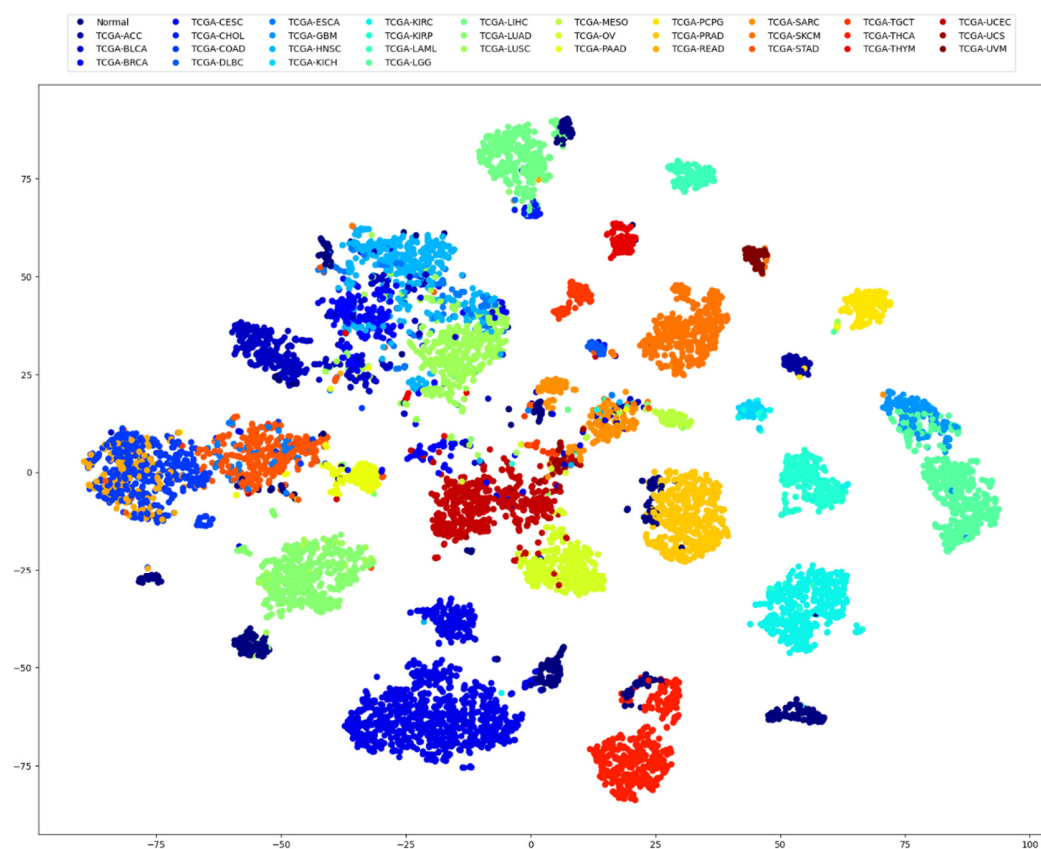

Supplementary Figure S3. Primary tumor distribution.

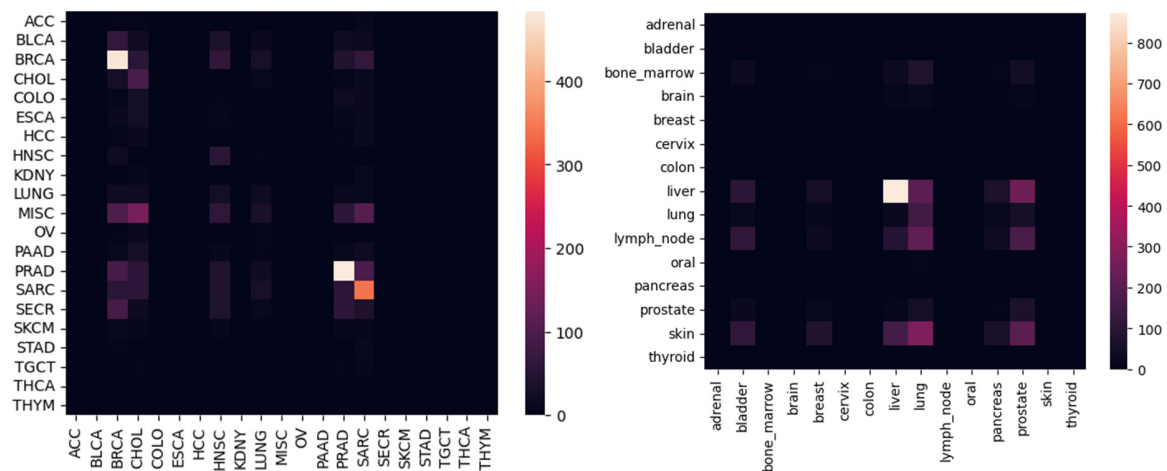

Supplementary Figure S4. Confusion matrix of benchmarking.
