# Supplementary material for: A Metastatic Cancer Expression Generator (MetGen): A Generative Contrastive Learning Framework for Metastatic Cancer Generation
Source: Cancers (Basel). 2024 Apr 25;16(9):1653. doi: 10.3390/cancers16091653 (PMC11083328; doi:10.3390/cancers16091653)
Supplement: Supplementary file 1 [file cancers-16-01653-s001.zip › Supplementary Table S1.csv]

	logFC	AveExpr	t	P.Value	adj.P.Val	B
KEGG_LONG_TERM_POTENTIATION	0.307594176752	-0.0104726796242813	115.769010199333	0	0	3927.30314909508
HALLMARK_KRAS_SIGNALING_DN	-0.225032633401852	0.00639271364536883	-99.8470344221978	0	0	3227.92321329407
HALLMARK_APICAL_SURFACE	-0.405581691352793	-0.015618553490285	-95.5446072154273	0	0	3036.2595906519
HALLMARK_TNFA_SIGNALING_VIA_NFKB	-0.505816093064341	-0.0634489358628155	-90.9779974810489	0	0	2832.21668348932
KEGG_PHOSPHATIDYLINOSITOL_SIGNALING_SYSTEM	-0.255305529851937	-0.02668349006885	-88.3061253207179	0	0	2712.72217119612
KEGG_PANCREATIC_CANCER	-0.321296526262129	-0.0264245215847473	-86.5110322444053	0	0	2632.45940464878
HALLMARK_INTERFERON_ALPHA_RESPONSE	-0.633930871847343	-0.0664499160258918	-82.1552595097499	0	0	2438.00677637968
KEGG_TYPE_II_DIABETES_MELLITUS	0.221721245409224	0.011293986944106	80.6584769888641	0	0	2371.35968301279
KEGG_SMALL_CELL_LUNG_CANCER	-0.381894846196988	-0.0345107836363238	-80.2056155982837	0	0	2351.21912286814
HALLMARK_APOPTOSIS	-0.351804975902313	-0.0478930711598929	-76.5276102024172	0	0	2188.16366389553
HALLMARK_COMPLEMENT	-0.419306024171246	-0.0302054076400603	-71.9963040626308	0	0	1988.99114293986
HALLMARK_COAGULATION	-0.417544403098816	-0.02330701949602	-70.9153318263503	0	0	1941.83861228768
KEGG_TASTE_TRANSDUCTION	0.468475076190843	0.0212416986534847	70.210044218959	0	0	1911.16108183465
KEGG_NOTCH_SIGNALING_PATHWAY	0.282572316113545	-0.015595595246262	70.1547280048367	0	0	1908.75806779081
HALLMARK_INTERFERON_GAMMA_RESPONSE	-0.547776433400386	-0.0589404995943699	-70.0047683988077	0	0	1902.24588716525
KEGG_DORSO_VENTRAL_AXIS_FORMATION	-0.432725573297024	-0.0478180210558482	-68.7771675378492	0	0	1849.06485089657
KEGG_REGULATION_OF_ACTIN_CYTOSKELETON	-0.287267799322254	-0.0339031040427953	-68.6540353887064	0	0	1843.74374151018
HALLMARK_PANCREAS_BETA_CELLS	0.436512336751876	0.00475533094980158	68.5490407080383	0	0	1839.20838376496
KEGG_NOD_LIKE_RECEPTOR_SIGNALING_PATHWAY	-0.555630836897218	-0.0517500991282305	-68.2933845321558	0	0	1828.1726160159
KEGG_ARRHYTHMOGENIC_RIGHT_VENTRICULAR_CARDIOMYOPATHY_ARVC	-0.339385028782575	-0.0410817350458735	-67.4331940414266	0	0	1791.1221413612
KEGG_RENAL_CELL_CARCINOMA	-0.305847536265777	-0.0452294717205138	-65.5333028331921	0	0	1709.75917037597
KEGG_PURINE_METABOLISM	0.321034425675535	-0.0117385416999899	64.9652654114916	0	0	1685.5669953485
HALLMARK_P53_PATHWAY	-0.338671977659886	-0.0119741685417433	-62.4080776697233	0	0	1577.49828817635
KEGG_ERBB_SIGNALING_PATHWAY	-0.156592265844492	0.00019737910769289	-61.1685119107673	0	0	1525.64752878262
KEGG_AMYOTROPHIC_LATERAL_SCLEROSIS_ALS	0.165786043075484	0.00739553104997025	61.0471441530751	0	0	1520.59077929207
HALLMARK_INFLAMMATORY_RESPONSE	-0.456691737130924	-0.0565786380697088	-58.795776148266	0	0	1427.47590615103
KEGG_VASOPRESSIN_REGULATED_WATER_REABSORPTION	0.282110033395624	0.002944675454333	58.6043571540228	0	0	1419.62166813262
KEGG_TIGHT_JUNCTION	0.164603824069363	-0.000564681137008105	58.4028052363029	0	0	1411.36272604436
KEGG_HUNTINGTONS_DISEASE	0.164182896110261	0.0149811025995603	57.5752283109178	0	0	1377.57256026841
KEGG_GLYCOSAMINOGLYCAN_BIOSYNTHESIS_HEPARAN_SULFATE	0.17046723164713	-0.00385882542018866	57.3092139712171	0	0	1366.75336438014
KEGG_MATURITY_ONSET_DIABETES_OF_THE_YOUNG	0.453717810411911	0.0281688853293256	55.7846920963514	0	0	1305.16086281658
KEGG_GNRH_SIGNALING_PATHWAY	0.174920915523702	0.00879417078202437	54.9898764366965	0	0	1273.33830744449
KEGG_LONG_TERM_DEPRESSION	0.225972953714277	-0.00570803030292252	54.886257089264	0	0	1269.20473491467
KEGG_CHRONIC_MYELOID_LEUKEMIA	-0.248091205177432	0.00302253229665567	-54.6076222744129	0	0	1258.10702994991
HALLMARK_EPITHELIAL_MESENCHYMAL_TRANSITION	-0.39806879226285	-0.0670988163204922	-54.1389506815151	0	0	1239.49883270756
KEGG_TOLL_LIKE_RECEPTOR_SIGNALING_PATHWAY	-0.393407408420918	-0.0556140656147972	-53.2587683041169	0	0	1204.75459981253
KEGG_BLADDER_CANCER	-0.298697356679192	-0.0187461818640956	-53.1438807845693	0	0	1200.23944578859
HALLMARK_IL6_JAK_STAT3_SIGNALING	-0.441702654494941	-0.0471493342632203	-51.773623686914	0	0	1146.75317848007
KEGG_EPITHELIAL_CELL_SIGNALING_IN_HELICOBACTER_PYLORI_INFECTION	-0.184610133287296	-0.0243195869978807	-51.414072466095	0	0	1132.83306841697
KEGG_ECM_RECEPTOR_INTERACTION	-0.336623622378774	-0.0578457450519392	-50.1534106744921	0	0	1084.41713484745
HALLMARK_UNFOLDED_PROTEIN_RESPONSE	-0.371143598917399	0.0139617905031845	-50.0500186274465	0	0	1080.47393012012
HALLMARK_HYPOXIA	-0.269046905720102	-0.006457766027022	-48.6281097974658	0	0	1026.68379354973
KEGG_SYSTEMIC_LUPUS_ERYTHEMATOSUS	-0.228148983194422	-0.0120881827096375	-47.8028027925068	0	0	995.849271015754
HALLMARK_UV_RESPONSE_DN	-0.238294289724708	-0.0476443825457271	-47.3811703922254	0	0	980.209639047861
KEGG_CYTOSOLIC_DNA_SENSING_PATHWAY	-0.45176694867658	-0.0486403342410494	-47.2665318603182	0	0	975.970783418361
HALLMARK_HEDGEHOG_SIGNALING	0.295029531156622	0.0212092309454867	46.9558688758611	0	0	964.51292476738
KEGG_JAK_STAT_SIGNALING_PATHWAY	-0.298572213386522	-0.0292975660111262	-46.312559677333	0	0	940.923573474589
KEGG_HYPERTROPHIC_CARDIOMYOPATHY_HCM	-0.327794410349849	-0.0466381855569151	-46.1327442692238	0	0	934.363475144357
KEGG_GAP_JUNCTION	0.143774942816547	-0.00421950421933805	46.041917656281	0	0	931.055525332829
KEGG_NON_SMALL_CELL_LUNG_CANCER	-0.185921023313793	0.0186682590762716	-45.5090573423391	0	0	911.725210648881
KEGG_P53_SIGNALING_PATHWAY	-0.285750994624591	0.00517043498412664	-44.1889999575526	0	0	864.415164660839
KEGG_COMPLEMENT_AND_COAGULATION_CASCADES	-0.361757332821355	-0.0206598890597561	-43.7583297770054	0	0	849.162596600903
HALLMARK_MYOGENESIS	-0.255014957574094	-0.03765656832682	-43.7050422481814	0	0	847.281732051821
KEGG_GLIOMA	-0.174734265904889	-0.00924115423038036	-43.5970564221309	0	0	843.474530390392
KEGG_ANTIGEN_PROCESSING_AND_PRESENTATION	-0.405376712828404	-0.0632583495091901	-43.1434157393974	0	0	827.544403564947
HALLMARK_APICAL_JUNCTION	-0.198735428071324	-0.0385148043279217	-42.7388078198972	0	0	813.423768062537
KEGG_ENDOCYTOSIS	-0.127387794210938	0.0126877181079043	-42.0952234239084	0	0	791.135927130282
KEGG_RIG_I_LIKE_RECEPTOR_SIGNALING_PATHWAY	-0.183964515417536	-0.0290368167705296	-40.7690641977758	0	0	745.89631339211
KEGG_PROSTATE_CANCER	-0.133840267040906	0.00406533536581704	-39.8991752153148	1.16310859268234e-317	3.82445890473711e-317	716.738050011293
HALLMARK_ESTROGEN_RESPONSE_LATE	-0.263114425231001	0.00640570932546739	-39.5608766120816	8.79382632236591e-313	2.84333717756695e-312	705.511739406666
HALLMARK_IL2_STAT5_SIGNALING	-0.208453560935506	-0.0279749761389643	-39.4609384685808	2.39904799177777e-311	7.62975918696515e-311	702.207625000457
KEGG_PATHWAYS_IN_CANCER	-0.178727312998593	-0.0213945177005009	-39.3603526456099	6.64869907521466e-310	2.08039938805104e-309	698.887788912011
KEGG_DILATED_CARDIOMYOPATHY	-0.25858727350294	-0.0362004821378134	-39.3568912225356	7.45314441062081e-310	2.29509526295308e-309	698.773646437107
KEGG_CYTOKINE_CYTOKINE_RECEPTOR_INTERACTION	-0.308115022302988	-0.0430653448525443	-38.5261003747391	4.92006216898784e-298	1.49139384497444e-297	671.575542530101
KEGG_GRAFT_VERSUS_HOST_DISEASE	-0.428348859716914	-0.0604307198364366	-38.5105861828917	8.14803117012529e-298	2.43187391846816e-297	671.071420739696
KEGG_FOCAL_ADHESION	-0.248122758007444	-0.0467214858351137	-37.6588245024652	7.00650805396632e-286	2.05948873101434e-285	643.609909379695
KEGG_HEMATOPOIETIC_CELL_LINEAGE	-0.304033501343707	-0.0574290870820247	-37.5006679289532	1.09919823059777e-283	3.18275308561146e-283	638.557920693022
KEGG_NATURAL_KILLER_CELL_MEDIATED_CYTOTOXICITY	-0.312885933463137	-0.0390773507751531	-37.2505899168979	3.1587669666395e-280	9.01177634600094e-280	630.600150794904
KEGG_MELANOMA	-0.164129477991246	-0.017815442687542	-37.0699245519775	9.72512392973125e-278	2.73431020633023e-277	624.874515328055
HALLMARK_TGF_BETA_SIGNALING	-0.250624778768329	-0.0587172894240311	-36.7540572341675	2.07931465709273e-273	5.76267204965699e-273	614.911433564589
KEGG_VEGF_SIGNALING_PATHWAY	0.120560400748498	0.0117629403820483	36.6934483753521	1.39882980116317e-272	3.82215466796698e-272	613.006635471645
HALLMARK_ADIPOGENESIS	-0.178584532416999	-0.00678539216265248	-36.6492392594585	5.61043209074727e-272	1.51169975778468e-271	611.618655619517
KEGG_PRION_DISEASES	-0.207265423346014	0.0245403985167322	-36.1825763814367	1.21598471740547e-265	3.23152102981727e-265	597.040410325375
KEGG_LEISHMANIA_INFECTION	-0.326194918637686	-0.0454438489444012	-35.3125962688865	5.50067027275824e-254	1.44206761204743e-253	570.223229331827
HALLMARK_WNT_BETA_CATENIN_SIGNALING	0.260588097520133	0.0133116582990184	34.6629221470857	2.03866612521878e-245	5.27334971056591e-245	550.5083223876
KEGG_ALLOGRAFT_REJECTION	-0.365047331680815	-0.0504346927646162	-33.2803664560495	1.4153388794447e-227	3.61283871858253e-227	509.461581543134
HALLMARK_ANDROGEN_RESPONSE	0.312908083742897	0.0109754391994711	33.2707903183369	1.87299911108653e-227	4.71898477338684e-227	509.181657355197
KEGG_PPAR_SIGNALING_PATHWAY	-0.216897257931603	-0.0113701550320881	-32.8685573969617	2.28804616742886e-222	5.69078149334871e-222	497.479062637964
HALLMARK_ESTROGEN_RESPONSE_EARLY	-0.229572641720481	0.00175330685296309	-32.1246185252002	4.39920415369366e-213	1.0803108934387e-212	476.121895515523
HALLMARK_UV_RESPONSE_UP	-0.144154004063494	0.00457110986630662	-31.519785502399	1.17647290293072e-205	2.85294678960701e-205	459.03665734264
KEGG_GLYCEROPHOSPHOLIPID_METABOLISM	-0.0977687257611548	0.0398895325214321	-31.4088724512677	2.63441757787097e-204	6.30959271736997e-204	455.93100642237
KEGG_HEDGEHOG_SIGNALING_PATHWAY	0.158808163349171	0.00531868794840351	31.1558851812145	3.06421586481134e-201	7.24948631430975e-201	448.879186525848
HALLMARK_KRAS_SIGNALING_UP	-0.178312676636275	-0.0160592864223268	-30.8699611253645	8.46683371558552e-198	1.97899486846216e-197	440.963136127203
HALLMARK_ALLOGRAFT_REJECTION	-0.303658082971826	-0.0496314823109994	-30.5205681771215	1.25652711446834e-193	2.90197928817689e-193	431.36800154804
KEGG_TGF_BETA_SIGNALING_PATHWAY	-0.159200544300892	-0.0210401773741623	-30.4802928859483	3.78109514776036e-193	8.62979363135893e-193	430.267499567233
KEGG_SPHINGOLIPID_METABOLISM	0.156308630836971	0.0204514112516084	30.0516510396856	4.35122101953474e-188	9.81554509057836e-188	418.626594151142
KEGG_ASTHMA	-0.32351382014089	-0.0513512249580155	-28.9543184724835	2.1555818057633e-175	4.80669965882851e-175	389.428294587269
KEGG_MELANOGENESIS	0.108096170164381	-0.00660366234364713	28.8901523662613	1.15913347478431e-174	2.55536243304722e-174	387.748068226516
KEGG_AUTOIMMUNE_THYROID_DISEASE	-0.301454467068687	-0.0579268268693772	-28.5738784425836	4.42493922669671e-171	9.64537314583328e-171	379.510520406715
KEGG_VIRAL_MYOCARDITIS	-0.255117119704466	-0.0455336794698214	-28.4291692653419	1.87951991812023e-169	4.05140960128138e-169	375.766113687312
KEGG_VASCULAR_SMOOTH_MUSCLE_CONTRACTION	0.0946829244702549	0.00404564242972133	28.3535866691219	1.32361012338314e-168	2.82176224105856e-168	373.816555538136
KEGG_CHEMOKINE_SIGNALING_PATHWAY	-0.214014951486709	-0.0251648046691738	-27.9488415910166	4.26475968636328e-164	8.99308020820084e-164	363.449032166931
KEGG_INOSITOL_PHOSPHATE_METABOLISM	-0.100804339935325	-0.0478198540024845	-27.7651486623088	4.5538841609826e-162	9.49950029280241e-162	358.784167892741
KEGG_WNT_SIGNALING_PATHWAY	0.128832786714101	0.00527932976682745	27.0485418663794	2.92569008269665e-154	6.03812634088458e-154	340.829406842104
KEGG_ALDOSTERONE_REGULATED_SODIUM_REABSORPTION	0.116973437861986	0.0098300906278291	26.9910998327791	1.21555431663445e-153	2.4822898676535e-153	339.407064965489
KEGG_CALCIUM_SIGNALING_PATHWAY	0.091942363425433	-0.00840122471527796	26.5377250471546	8.47945037866092e-149	1.71355559735439e-148	328.269548553855
KEGG_INTESTINAL_IMMUNE_NETWORK_FOR_IGA_PRODUCTION	-0.23906020469285	-0.0337375672592447	-25.6889721787859	6.47071010740659e-140	1.29414202148132e-139	307.846067844745
KEGG_LYSOSOME	-0.16608835171048	-0.0233707522455076	-25.4389582287597	2.40448096601167e-137	4.75989089190066e-137	301.937148896653
KEGG_TYPE_I_DIABETES_MELLITUS	-0.234658860047748	-0.0444054406288833	-24.9924633632621	8.27510632190781e-133	1.62158649136375e-132	291.50701261024
KEGG_GLYCINE_SERINE_AND_THREONINE_METABOLISM	0.258291520872851	-0.00059200523015235	24.9222906069917	4.21277499851709e-132	8.17278349712316e-132	289.882121789006
KEGG_COLORECTAL_CANCER	-0.11774689274052	-0.0235868136760513	-24.733800090571	3.27104704310975e-130	6.28300125112171e-130	285.536891905351
HALLMARK_REACTIVE_OXYGEN_SPECIES_PATHWAY	-0.188265935683719	0.00203932518558681	-24.5508442748191	2.1755508469597e-128	4.13781239519785e-128	281.346333877177
KEGG_PROGESTERONE_MEDIATED_OOCYTE_MATURATION	0.13374545494507	0.0249752859525794	24.2822301084536	9.83743192416464e-126	1.85287552746402e-125	275.24231718837
KEGG_APOPTOSIS	-0.158774933859075	-0.037588599856843	-24.0979910955677	6.30388136264866e-124	1.17591633110946e-123	271.089154775469
HALLMARK_HEME_METABOLISM	0.116605080798322	0.0142967403077846	23.7783097183636	8.06082823085058e-121	1.48933397789049e-120	263.947803974901
KEGG_NEUROACTIVE_LIGAND_RECEPTOR_INTERACTION	0.0940292260388968	-0.00178244868547018	23.7714810422523	9.38322504362978e-121	1.7173072249662e-120	263.796160595374
KEGG_DRUG_METABOLISM_CYTOCHROME_P450	-0.191580143856801	-0.00211789705042787	-23.4789239587418	6.07241333642856e-118	1.10097961426836e-117	257.334958123957
KEGG_GLYCEROLIPID_METABOLISM	-0.125842289526973	-0.0108145033130385	-23.3575062311608	8.73227289714063e-117	1.56857494633822e-116	254.673876241303
HALLMARK_ANGIOGENESIS	-0.150139376866328	-0.0241392117355227	-22.7931370139137	1.79458318832276e-111	3.19402879389555e-111	242.463179725949
KEGG_FC_GAMMA_R_MEDIATED_PHAGOCYTOSIS	-0.0968527859046101	-2.67572761013097e-05	-22.633363752803	5.46276084188171e-110	9.63432366659139e-110	239.053915368574
HALLMARK_GLYCOLYSIS	-0.172814143717639	0.0240766512275152	-22.4173811446729	5.34822823490439e-108	9.34735385199506e-108	234.478806895652
KEGG_B_CELL_RECEPTOR_SIGNALING_PATHWAY	-0.161387500031857	-0.0265612661285432	-22.1198099825385	2.77693008096661e-105	4.81003960453145e-105	228.238854561324
KEGG_ADIPOCYTOKINE_SIGNALING_PATHWAY	-0.107856625448088	-0.0115912184006142	-21.6871222765962	2.16153938112769e-101	3.71096141538737e-101	219.297384361903
KEGG_ACUTE_MYELOID_LEUKEMIA	-0.0863918678401308	0.0117315051767338	-21.6063658411045	1.13106317844062e-100	1.92479172471474e-100	217.645931140574
KEGG_BETA_ALANINE_METABOLISM	-0.190839073502806	-0.00848309183213651	-21.3182206769587	3.96801282231331e-98	6.69386510894593e-98	211.798151488861
KEGG_MTOR_SIGNALING_PATHWAY	0.113979319794174	-0.0325800881918386	21.3115738146807	4.53862852451232e-98	7.59046494616715e-98	211.664082551227
KEGG_STEROID_HORMONE_BIOSYNTHESIS	-0.193202720775644	-0.0196676645632992	-21.0842146721363	4.396686107732e-96	7.29023166581203e-96	207.100684837048
KEGG_ETHER_LIPID_METABOLISM	0.105001210631776	0.0487685821849497	21.0163589503969	1.70701123707867e-95	2.80644220333274e-95	205.74721422934
KEGG_PROXIMAL_TUBULE_BICARBONATE_RECLAMATION	0.0850664334393158	-0.00786712309801064	20.8501613896523	4.65566504581358e-94	7.58990772174651e-94	202.448700235549
HALLMARK_BILE_ACID_METABOLISM	0.153548949992508	0.00172232627707104	19.3412953319077	1.71408048855271e-81	2.77109678982687e-81	173.58473793673
KEGG_METABOLISM_OF_XENOBIOTICS_BY_CYTOCHROME_P450	-0.155722854916917	-0.00644385382965214	-18.9986580158979	9.30578675938703e-79	1.49200217464552e-78	167.304644627833
KEGG_LEUKOCYTE_TRANSENDOTHELIAL_MIGRATION	-0.107016218154853	-0.0208276486266622	-18.6823760581178	2.84244611573948e-76	4.51995529879885e-76	161.5986988697
KEGG_DRUG_METABOLISM_OTHER_ENZYMES	-0.167707461137558	0.000126833011807206	-17.6789868861193	1.2151357576779e-68	1.91655558528059e-68	144.080067409157
KEGG_CELL_ADHESION_MOLECULES_CAMS	-0.102229866275419	-0.0197849442005603	-16.8389676096794	1.49669336678852e-62	2.34160091255623e-62	130.102406367488
KEGG_OOCYTE_MEIOSIS	0.121697047637138	0.021290330803554	16.287057914785	1.06515197516805e-58	1.65311586546081e-58	121.263957941884
KEGG_GLYCOSPHINGOLIPID_BIOSYNTHESIS_LACTO_AND_NEOLACTO_SERIES	-0.102185703367863	0.0165547816384222	-16.076126177618	2.93914657084834e-57	4.52535265670301e-57	117.958809122159
KEGG_BASAL_CELL_CARCINOMA	0.0872875758110374	-0.0127320132932395	15.6375464141588	2.55884861097361e-54	3.90879236636913e-54	111.216040077084
HALLMARK_CHOLESTEROL_HOMEOSTASIS	-0.108462173199389	-0.00331273222380057	-15.3121757489476	3.46732757259212e-52	5.25516835220993e-52	106.32715713898
KEGG_PENTOSE_PHOSPHATE_PATHWAY	0.149209667767402	-0.0239273925420289	14.9968848750316	3.6804402772681e-50	5.53492568829467e-50	101.682263083609
KEGG_STARCH_AND_SUCROSE_METABOLISM	-0.0912002445584665	0.0156428231619195	-14.9259382332769	1.03831263136578e-49	1.5494819268074e-49	100.649657395139
KEGG_ABC_TRANSPORTERS	-0.0759050583302848	0.0120653495612555	-14.9245288155051	1.0598783516713e-49	1.56959084140636e-49	100.629190680448
KEGG_NICOTINATE_AND_NICOTINAMIDE_METABOLISM	-0.123755383918094	0.026922180273962	-14.9032536255508	1.44519563573033e-49	2.12399964645214e-49	100.320467285586
HALLMARK_PROTEIN_SECRETION	-0.0903931957051248	-0.00968419523248275	-14.4264370725217	1.35155521756312e-46	1.97144144516726e-46	93.510888831619
HALLMARK_DNA_REPAIR	-0.089729042372824	-0.0188421615211526	-14.2377022941527	1.91295168944517e-45	2.76949722203256e-45	90.8735554146311
KEGG_FC_EPSILON_RI_SIGNALING_PATHWAY	-0.0811904485460153	-0.0125039926156863	-14.1245625987213	9.22086197937339e-45	1.32507201777662e-44	89.3083973461893
KEGG_ALZHEIMERS_DISEASE	0.0497536871288686	-0.0317175486665947	14.0280226885356	3.49592330843237e-44	4.98683177820499e-44	87.982272572668
HALLMARK_XENOBIOTIC_METABOLISM	-0.115552346986472	-0.0078721595360966	-13.8518871418794	3.88969723629642e-43	5.50803842220077e-43	85.5850979665514
KEGG_OLFACTORY_TRANSDUCTION	0.0805951132522861	-0.0375056830801997	13.8205110095996	5.95663869669666e-43	8.37382541419675e-43	85.1611030771699
KEGG_FRUCTOSE_AND_MANNOSE_METABOLISM	0.128925832049374	0.00868202704124586	13.685075416892	3.71006573847442e-42	5.17807736161178e-42	83.3414445010095
HALLMARK_OXIDATIVE_PHOSPHORYLATION	-0.138191111703278	-0.0233829471598887	-13.5902983955961	1.32096728468154e-41	1.83048323734441e-41	82.0782294882628
HALLMARK_PEROXISOME	0.108073448615366	0.0181495914567471	13.5745366826067	1.63026786513456e-41	2.2430635874901e-41	81.8689657786534
HALLMARK_MTORC1_SIGNALING	-0.121297584615266	0.0222392802229196	-13.5563981235104	2.07625150336795e-41	2.83656895530551e-41	81.6284323805349
KEGG_PRIMARY_BILE_ACID_BIOSYNTHESIS	-0.107994218006748	-0.00921676332486954	-13.507647931181	3.9708439326323e-41	5.3870190414732e-41	80.9834839935752
KEGG_NITROGEN_METABOLISM	-0.0697426348849986	0.0239208775255467	-13.4520221993591	8.29909970788449e-41	1.11807315508999e-40	80.2502864287221
HALLMARK_MITOTIC_SPINDLE	-0.0943854114896934	0.0101176979247833	-12.7181047963288	1.06135540448376e-36	1.42002033427483e-36	70.8479947233141
KEGG_UBIQUITIN_MEDIATED_PROTEOLYSIS	-0.058121103246957	0.0219733680899841	-12.6640638866904	2.08751792996431e-36	2.77382519461011e-36	70.1756701593289
HALLMARK_NOTCH_SIGNALING	0.0658509628853211	-0.039762614064471	12.5259911841082	1.16094114349724e-35	1.53212640706438e-35	68.4703984556145
KEGG_O_GLYCAN_BIOSYNTHESIS	0.0508472074550585	-0.0287255039152791	12.314064889985	1.56130313324837e-34	2.04657302601476e-34	65.8879790999255
KEGG_CELL_CYCLE	-0.107806055511203	0.0405308972549388	-12.0357751245686	4.44424488486858e-33	5.78646649439265e-33	62.5613574753284
KEGG_GLUTATHIONE_METABOLISM	-0.0764156462339964	0.00883930171180945	-11.8556617584254	3.73415053689194e-32	4.82950136104691e-32	60.4474130518151
KEGG_PEROXISOME	0.109251024169354	0.0133375387857011	11.8387757185842	4.55172263353667e-32	5.84790854904711e-32	60.2508033363391
KEGG_VIBRIO_CHOLERAE_INFECTION	0.0594618319827873	-0.0175444447616229	11.4030060815895	6.86641709671872e-30	8.76371655765416e-30	55.2707030828639
KEGG_T_CELL_RECEPTOR_SIGNALING_PATHWAY	-0.0889952223178403	-0.0198872774756246	-10.9894736204634	6.79270689981608e-28	8.61297476185829e-28	50.7120009580075
KEGG_PRIMARY_IMMUNODEFICIENCY	-0.117493712487432	-0.0294668798527077	-10.6971400690856	1.58528538674792e-26	1.99704782486427e-26	47.5879592919049
KEGG_RENIN_ANGIOTENSIN_SYSTEM	-0.0734878987840392	-0.0594403388962376	-9.92092242474797	4.58606893696247e-23	5.73998305658529e-23	39.6907091883485
KEGG_PATHOGENIC_ESCHERICHIA_COLI_INFECTION	-0.0505417453363747	0.00856425378547184	-9.86364250329136	8.07210822968381e-23	1.00383910035812e-22	39.1309096673963
HALLMARK_SPERMATOGENESIS	0.0635595807621334	0.0235732574743331	9.52973846404701	2.04774320948133e-21	2.53033237349922e-21	35.9306673031959
KEGG_AXON_GUIDANCE	-0.0354929489454226	-0.00427888845351795	-9.39439597726081	7.36714948416422e-21	9.04574050587253e-21	34.6641816185586
KEGG_OXIDATIVE_PHOSPHORYLATION	-0.0453332744218271	-0.0383035205531232	-9.37168020346053	9.11751099590062e-21	1.11245102717278e-20	34.4533521560318
KEGG_AMINO_SUGAR_AND_NUCLEOTIDE_SUGAR_METABOLISM	-0.061411119435153	-0.0184033720199844	-9.35846700550971	1.03187543700679e-20	1.25114896737073e-20	34.3309476207387
KEGG_GLYCOSAMINOGLYCAN_BIOSYNTHESIS_CHONDROITIN_SULFATE	-0.0495476921744839	-0.000926907119328941	-9.25993972848165	2.5831277836882e-20	3.11258875798453e-20	33.4235382426244
KEGG_PROPANOATE_METABOLISM	-0.0810073963410382	-0.0460330624652485	-8.1770913161243	3.35490405330835e-16	4.01760115025815e-16	24.0716092879713
HALLMARK_G2M_CHECKPOINT	-0.0831180073004255	0.029423883933454	-7.89527433869577	3.28122069046428e-15	3.90525652730104e-15	21.824948248342
KEGG_PYRUVATE_METABOLISM	-0.0709853738002895	-0.0187149979333579	-7.85246375713823	4.60868010342784e-15	5.45173134185976e-15	21.4904452573284
KEGG_TYROSINE_METABOLISM	-0.0582851799771537	0.0279864168137078	-7.55511350831473	4.64747911271739e-14	5.46430877495257e-14	19.2165266228351
KEGG_PYRIMIDINE_METABOLISM	-0.0446664639168067	0.0305801241575306	-7.21811103340961	5.7543978629083e-13	6.725019189182e-13	16.7440154707789
KEGG_TRYPTOPHAN_METABOLISM	0.0626996460942395	-0.00195699926351847	7.03973231886627	2.08541174098996e-12	2.42257411827576e-12	15.4803575517929
KEGG_FATTY_ACID_METABOLISM	0.0681741921514434	-0.0148370797933313	6.86060857664687	7.36754290864601e-12	8.50775788260313e-12	14.2428524178219
KEGG_PARKINSONS_DISEASE	0.0233637511423642	-0.00604717044172978	6.6605393904303	2.90854699775865e-11	3.33880542937975e-11	12.8979141947284
KEGG_BUTANOATE_METABOLISM	0.0594907853290147	-0.0107263277499078	6.25675829615958	4.13270324198377e-10	4.7161436996756e-10	10.3034957939357
KEGG_GLYCOLYSIS_GLUCONEOGENESIS	0.0560190259338858	0.00845368839462804	6.20678188939807	5.67733554837304e-10	6.44095378002556e-10	9.99354949567327
KEGG_CARDIAC_MUSCLE_CONTRACTION	-0.0308734663411735	-0.0139095813798364	-6.02011074990499	1.81982269701293e-09	2.05259071639831e-09	8.85761900163564
KEGG_ENDOMETRIAL_CANCER	-0.0183252787421348	0.0134532912404283	-5.23754309065458	1.66871555374843e-07	1.87127640131327e-07	4.47000882132906
KEGG_ALANINE_ASPARTATE_AND_GLUTAMATE_METABOLISM	-0.0444382000211389	-0.0329431941199356	-5.23155699487335	1.72348800452231e-07	1.92159007400763e-07	4.43878032200679
KEGG_LYSINE_DEGRADATION	-0.0521110151836692	-0.017354784845589	-4.88478837529972	1.0554899777082e-06	1.17008603243081e-06	2.69031055267014
KEGG_CYSTEINE_AND_METHIONINE_METABOLISM	0.0394080512282936	-0.0248231718284839	4.82086144806846	1.4557489551907e-06	1.60463237106248e-06	2.38098569069881
KEGG_HISTIDINE_METABOLISM	-0.0338160526734994	0.0114256149163879	-3.80446327069725	0.000143170481974631	0.000156921319226432	-1.992219275847
KEGG_MAPK_SIGNALING_PATHWAY	0.0107360780835662	-0.0106041139253268	3.69642724754125	0.000220115864163763	0.000239901559818932	-2.39670318139569
KEGG_ADHERENS_JUNCTION	-0.0163952692676083	-0.0126954124305277	-3.60865982067373	0.000309661828285698	0.000335611143505169	-2.71675324387049
KEGG_ARACHIDONIC_ACID_METABOLISM	-0.023749906480735	0.018624703862639	-3.30418669692064	0.00095670931157145	0.00103112003580478	-3.76760011366491
HALLMARK_MYC_TARGETS_V1	0.0332156175403899	-0.000203976440516496	2.93643416594388	0.00332954896857282	0.00356868784476866	-4.91373641116204
KEGG_BIOSYNTHESIS_OF_UNSATURATED_FATTY_ACIDS	-0.0294049378351785	0.00422063472574209	-2.87304939222038	0.00407600143354648	0.00433397122426545	-5.09766424623008
KEGG_VALINE_LEUCINE_AND_ISOLEUCINE_DEGRADATION	-0.0280320180273152	-0.0229290485850615	-2.87210184191528	0.00408823058783803	0.00433397122426545	-5.10038343187812
HALLMARK_FATTY_ACID_METABOLISM	0.0205505954157676	0.0161301308998247	2.67619201889906	0.00746156611337681	0.00786708601084294	-5.64335914255354
KEGG_PHENYLALANINE_METABOLISM	-0.021962133943229	0.036643744958194	-2.59789371965946	0.00939693749964172	0.0098540858104351	-5.84966184471487
HALLMARK_E2F_TARGETS	0.0276022972004204	0.0539706176200411	2.34582118559746	0.0190094915875057	0.0198271041289038	-6.47229083335943
KEGG_NEUROTROPHIN_SIGNALING_PATHWAY	0.00541024229966677	0.00159038959568691	1.81419356587122	0.0696853626356804	0.0722939056220428	-7.57750533642358
HALLMARK_PI3K_AKT_MTOR_SIGNALING	-0.00466454763455713	0.00533709016863482	-1.13484760126891	0.256473168448131	0.264658482334773	-8.57895780791895
KEGG_ASCORBATE_AND_ALDARATE_METABOLISM	0.0117602612777534	0.00174924902681404	1.12145800695876	0.262126607354608	0.269061173686741	-8.59406135742149
KEGG_RETINOL_METABOLISM	-0.010329838926264	-0.0367039136448607	-1.00884297971139	0.313080447671541	0.319671614990942	-8.7139997781368
KEGG_THYROID_CANCER	0.00503925470903297	0.0122138548441707	0.894736534869298	0.370954853593728	0.37678136961876	-8.82259597391986
KEGG_LINOLEIC_ACID_METABOLISM	0.00422480512943512	0.0121527602321884	0.467623013019071	0.640066938520643	0.646734302463567	-9.11352708099229
KEGG_INSULIN_SIGNALING_PATHWAY	-0.000445438757355324	-0.0109806601004962	-0.11008628050715	0.912343709105932	0.917070878583165	-9.21680477096865
KEGG_ARGININE_AND_PROLINE_METABOLISM	0.000109728011590812	0.00924918202923486	0.0130621707872073	0.989578517579834	0.989578517579834	-9.2227791262451
