# Supplementary material for: A Metastatic Cancer Expression Generator (MetGen): A Generative Contrastive Learning Framework for Metastatic Cancer Generation
Source: Cancers (Basel). 2024 Apr 25;16(9):1653. doi: 10.3390/cancers16091653 (PMC11083328; doi:10.3390/cancers16091653)
Supplement: Supplementary file 1 [file cancers-16-01653-s001.zip › Supplementary Table S2.csv]

	logFC1	logFC2	logFC3	logFC4	logFC5
HALLMARK_ADIPOGENESIS	-3.7234835492859	0.380746082339101	-3.50296175557105	-22.3481240627721	10.1879539209285
HALLMARK_ALLOGRAFT_REJECTION	-30.8395256849292	-26.0467945747885	-8.29930329030788	-92.6257536551311	-16.6870744974021
HALLMARK_ANDROGEN_RESPONSE	-33.3265395667868	-1.2487123235187	-66.9000757163021	-15.3542591514833	-11.3276221285178
HALLMARK_ANGIOGENESIS	-31.7207697191072	-4.48109953388507	-22.3862850166229	-64.8175008197979	-50.4214565815116
HALLMARK_APICAL_JUNCTION	-30.7154518240784	-3.23771608212496	-9.15953977386039	-40.0933947554747	2.67693430204031
HALLMARK_APICAL_SURFACE	-5.01821264044156	-4.10143662526707	12.4659264498857	-9.58277392059722	0.692979494217298
HALLMARK_APOPTOSIS	-19.4462931233702	-3.24930227223467	-7.47987383402187	-35.575673675793	-19.6364217506061
HALLMARK_BILE_ACID_METABOLISM	46.8445556906116	-1.35237937395721	-7.39229421655284	32.6135778879153	-71.8459464872217
HALLMARK_CHOLESTEROL_HOMEOSTASIS	-1.93443673823504	-4.13527353077461	-14.2214308022176	-7.19491947064489	-23.9935897609516
HALLMARK_COAGULATION	32.461679936752	-10.0028248378987	12.1377717523806	-4.45760248063493	-76.7429882983599
HALLMARK_COMPLEMENT	8.77747685207396	-12.3574094047444	3.52262381369655	-37.8045506223982	-36.354804991355
HALLMARK_DNA_REPAIR	-0.729943933970844	-5.95236180852089	-4.4255514138149	18.1698764978837	-4.43625528863595
HALLMARK_E2F_TARGETS	-9.10016506745205	-12.3957496881594	-18.0558734619435	28.9766567319662	-40.783294383335
HALLMARK_EPITHELIAL_MESENCHYMAL_TRANSITION	-37.3584909631045	-0.869444605828448	-8.34054165157886	-60.9336881645349	13.2426244651765
HALLMARK_ESTROGEN_RESPONSE_EARLY	13.3219380024325	1.39336240246871	19.4606912620657	55.6913984870887	27.596087144118
HALLMARK_ESTROGEN_RESPONSE_LATE	9.05572020381987	-5.53182033325129	12.6955571695971	30.1544479978161	5.72191961252565
HALLMARK_FATTY_ACID_METABOLISM	27.3104015572853	-7.52917092062421	-13.5883529276773	-5.80444528980775	-42.0437500664357
HALLMARK_G2M_CHECKPOINT	-4.74704182935284	-9.02735496298328	-3.2943891074865	30.8706961882722	-25.4543692654465
HALLMARK_GLYCOLYSIS	-3.83087451960773	-4.9895582522829	-15.3816573990875	-6.32859831312817	-29.1952001463644
HALLMARK_HEDGEHOG_SIGNALING	-44.0218112483381	12.8768777029749	-25.8935045591531	-23.9528431488233	-32.7513802589798
HALLMARK_HEME_METABOLISM	-9.74509543842055	0.398905135908194	-11.127149779659	-13.5257465220384	-13.4628820271107
HALLMARK_HYPOXIA	-17.8582953796381	-1.31029047993889	-8.71274371696882	-22.925940285636	-22.4431088360125
HALLMARK_IL2_STAT5_SIGNALING	-24.0989070342278	-5.45008653060404	-12.5315702833675	-46.7908500618662	-9.48335689855571
HALLMARK_IL6_JAK_STAT3_SIGNALING	-21.0383195438353	-15.053754407819	-12.185917687018	-96.6129228276957	-19.3006408643457
HALLMARK_INFLAMMATORY_RESPONSE	-13.6022944281358	-15.0621175898856	3.93050100833898	-61.8811702516367	-6.32900645929044
HALLMARK_INTERFERON_ALPHA_RESPONSE	-4.74433136166908	-10.8819984677211	16.6758469524138	-24.9051920432585	-14.3682153490986
HALLMARK_INTERFERON_GAMMA_RESPONSE	-13.9789066800515	-16.4009229926041	6.40138516934439	-51.4992775409555	-11.6611468468334
HALLMARK_KRAS_SIGNALING_DN	9.68779151830293	-2.20686589113953	30.3126973382046	43.2432811881862	-4.60077621731895
HALLMARK_KRAS_SIGNALING_UP	-24.6077426802692	-10.7003395890245	-20.3705865179231	-73.6863873807258	-16.246120073085
HALLMARK_MITOTIC_SPINDLE	-13.1956750146201	-0.747795941107142	-5.18517619160502	15.9775831302618	-16.055173960578
HALLMARK_MTORC1_SIGNALING	-8.908124309698	-11.3862832818736	-16.2762109718064	-2.20817517204705	-20.7377838827442
HALLMARK_MYC_TARGETS_V1	-16.8280761940482	-10.2614468224442	-27.7020693639961	-1.32780373744163	-50.6688435834963
HALLMARK_MYOGENESIS	-46.5038628343477	-5.60048323666729	3.0689948189322	-30.3728794524475	30.4354315849323
HALLMARK_NOTCH_SIGNALING	-29.8192160326983	2.73759756100208	-10.2906141883839	-21.6758072633904	-13.2369131412154
HALLMARK_OXIDATIVE_PHOSPHORYLATION	19.6897980701956	5.44265509128991	-6.41420898865044	7.59377886545053	9.21927073933284
HALLMARK_P53_PATHWAY	-20.0778196146043	-9.87091838378137	-1.03033905573557	-24.5489284356177	-27.9034334723333
HALLMARK_PANCREAS_BETA_CELLS	4.3426272581803	11.0354500525095	-75.8105142511366	6.37291150374699	-51.3525586154497
HALLMARK_PEROXISOME	27.7563628177904	-0.80562610337256	-4.91296519409389	28.2329446430372	-49.8500512511148
HALLMARK_PI3K_AKT_MTOR_SIGNALING	8.09714780669344	-3.76430991526911	13.7933596662054	34.2942330959828	20.6318505688166
HALLMARK_PROTEIN_SECRETION	-11.2941999843747	-12.0989151853919	-28.343778293749	-53.5513065895639	-28.747575646265
HALLMARK_REACTIVE_OXYGEN_SPECIES_PATHWAY	-8.79760651954211	-6.98805458988591	-11.0150867221469	-22.06359655595	-26.4808542971036
HALLMARK_SPERMATOGENESIS	-0.750535069038769	6.07587764162909	-0.744623039771277	30.6890563199949	-3.51508777333416
HALLMARK_TGF_BETA_SIGNALING	-35.9629308207486	3.73532004588469	-18.5251804020713	-61.0511203769797	-20.7116636278406
HALLMARK_TNFA_SIGNALING_VIA_NFKB	-18.554733635498	-5.96283974167113	9.45497847933393	-48.1291965719852	-8.44925017998139
HALLMARK_UNFOLDED_PROTEIN_RESPONSE	1.6206250472942	-6.76929231858321	4.67391771049097	7.86997751307854	-28.0132816939567
HALLMARK_UV_RESPONSE_DN	-21.1396178580412	5.49411939437914	-5.690226532	-28.5910013712576	13.6563454825002
HALLMARK_UV_RESPONSE_UP	-9.90142196886677	0.468397393351779	-7.4434247010679	-24.3987634714415	-24.4409620999591
HALLMARK_WNT_BETA_CATENIN_SIGNALING	-62.2703473057693	7.71242134337831	-31.1672629839111	-51.5987929156372	-25.8400867247883
HALLMARK_XENOBIOTIC_METABOLISM	62.323989327095	-8.31226588584195	13.1145812254158	15.9910220215754	-74.7943373322789
KEGG_ABC_TRANSPORTERS	61.9845820040325	9.08740327852423	25.3525630907488	56.1882680491058	37.8558616547036
KEGG_ACUTE_MYELOID_LEUKEMIA	-28.6098342930131	0.9733751147578	-3.45689421879115	-29.1828593161783	9.43181834172833
KEGG_ADHERENS_JUNCTION	-30.757036046924	-9.7898531513988	-21.0812209493613	-55.6024645539608	-19.2155977299458
KEGG_ADIPOCYTOKINE_SIGNALING_PATHWAY	6.40546050235315	-2.32802877503275	-14.3879977430528	-22.5428965804455	-7.87913477844972
KEGG_ALANINE_ASPARTATE_AND_GLUTAMATE_METABOLISM	33.3309274623249	-2.35298998751796	18.3049230379315	26.8619322841182	-44.2617344586891
KEGG_ALDOSTERONE_REGULATED_SODIUM_REABSORPTION	-8.195990517675	3.21723233352304	-15.8608600479306	4.16537466983186	-7.40025491749998
KEGG_ALLOGRAFT_REJECTION	-30.9819920884561	-18.9686716499471	-10.4956413627465	-71.5288135837607	-22.4808786210167
KEGG_ALZHEIMERS_DISEASE	-23.3588154288811	2.80853325319356	-3.06138692077764	18.7505868666282	17.4283868005363
KEGG_AMINO_SUGAR_AND_NUCLEOTIDE_SUGAR_METABOLISM	-21.9189435506973	-27.3673718280979	-21.9915017754174	-46.9198793603518	-0.902292221567905
KEGG_AMYOTROPHIC_LATERAL_SCLEROSIS_ALS	-28.549604858721	3.74583322549955	-20.330091832042	-6.57842393474743	-6.25896992447565
KEGG_ANTIGEN_PROCESSING_AND_PRESENTATION	-38.7954195005827	-3.57466907157914	-3.57349472122587	-34.680125576057	-14.3619570601099
KEGG_APOPTOSIS	-13.5449418419145	3.06810269516018	-7.55601647277695	-21.9764990531738	3.82410322724456
KEGG_ARACHIDONIC_ACID_METABOLISM	47.56357707013	-21.2668105578853	2.6549763066688	-8.29530527852012	-67.9366616990378
KEGG_ARGININE_AND_PROLINE_METABOLISM	26.2027025976247	-6.02805935991432	-9.67646246455911	13.4386169807408	-27.6124401661925
KEGG_ARRHYTHMOGENIC_RIGHT_VENTRICULAR_CARDIOMYOPATHY_ARVC	-16.0584541848061	6.700008543119	8.69468612689559	-16.5380553979365	34.0707345198107
KEGG_ASCORBATE_AND_ALDARATE_METABOLISM	90.8532033511161	-7.82773971954566	-2.66804830489389	22.8520669490096	-102.229088238831
KEGG_ASTHMA	-17.3230651181416	-14.9099952518807	2.31738778445447	-57.5223596935252	-10.3208167279477
KEGG_AUTOIMMUNE_THYROID_DISEASE	-29.1649413280466	-18.115113410599	-8.55725556289417	-71.2989985190022	-17.3171776048596
KEGG_AXON_GUIDANCE	-14.6950883150962	4.46250542341954	2.23313782160471	-6.56520600733506	13.6456457955014
KEGG_B_CELL_RECEPTOR_SIGNALING_PATHWAY	-10.2486677860693	-20.0818434873806	-13.4416319354107	-61.2085631887142	3.32210368838196
KEGG_BASAL_CELL_CARCINOMA	-28.6076527966745	2.01987357225443	-17.809202728961	-29.9906023210327	-12.8205003408226
KEGG_BETA_ALANINE_METABOLISM	73.0370586480778	7.37838598217888	15.8662551927744	56.2537537726411	-15.153523512011
KEGG_BIOSYNTHESIS_OF_UNSATURATED_FATTY_ACIDS	39.7898471293647	8.62306751600659	10.3564271198773	70.1718694864062	-32.2172453767903
KEGG_BLADDER_CANCER	-35.7129382693784	-12.2182216888755	-14.585406478142	-36.4863780457499	-29.8035110237606
KEGG_BUTANOATE_METABOLISM	44.6497076137168	-1.74355025952173	-12.9461358966935	41.2758305471143	-47.0037146617128
KEGG_CALCIUM_SIGNALING_PATHWAY	-7.99746582950763	5.53637386031784	0.118742454715971	23.8013560726233	31.4490654198284
KEGG_CARDIAC_MUSCLE_CONTRACTION	-26.4045363342524	5.1106493118246	-4.65853052941605	-4.68091620332547	36.681951355447
KEGG_CELL_ADHESION_MOLECULES_CAMS	-23.5852624612169	-8.24441830290016	-19.1242459280033	-64.7671944672218	-6.72320537246424
KEGG_CELL_CYCLE	-18.6542086789857	-9.78917934898868	-13.1392466528025	6.0287995832598	-37.0206674347696
KEGG_CHEMOKINE_SIGNALING_PATHWAY	-15.1888060484	-13.2820230124625	3.96108265716464	-62.6475258540967	0.0457663110313433
KEGG_CHRONIC_MYELOID_LEUKEMIA	-23.5620141944125	-2.53179440729309	-4.11003741753302	-10.142635018304	-7.09481145276641
KEGG_COLORECTAL_CANCER	-26.6632637312086	5.18109818241192	-3.1970332645667	-27.49731052112	17.5364012682562
KEGG_COMPLEMENT_AND_COAGULATION_CASCADES	67.9206717312102	-12.1417270283175	28.1987088176033	17.6217305774878	-114.245429770727
KEGG_CYSTEINE_AND_METHIONINE_METABOLISM	79.2939261514437	-9.03782589258674	25.0320061046036	45.6194342901945	-89.9546699526112
KEGG_CYTOKINE_CYTOKINE_RECEPTOR_INTERACTION	-6.90700301420526	-11.1017812584138	5.25184840492818	-58.9631712623103	-6.8418404584632
KEGG_CYTOSOLIC_DNA_SENSING_PATHWAY	-5.0407574138585	-25.2591070695751	16.586447126371	-79.6680026944041	-27.222723450607
KEGG_DILATED_CARDIOMYOPATHY	-24.7338544845654	7.82382281734249	5.22622911898611	-10.0607507952466	57.4739779778114
KEGG_DORSO_VENTRAL_AXIS_FORMATION	-25.5442222267034	-7.37923509493089	18.1100902297912	-14.3683628981987	-38.5771836658323
KEGG_DRUG_METABOLISM_CYTOCHROME_P450	125.700596021332	-6.84969710487815	52.202351682348	57.2573254968115	-110.24550730273
KEGG_DRUG_METABOLISM_OTHER_ENZYMES	113.521963209004	-18.3847334205745	23.485958252098	55.5757243702897	-98.0374232137229
KEGG_ECM_RECEPTOR_INTERACTION	-31.3866693758719	1.97550964214815	-7.55338070199446	-40.3786829520689	11.3088621904069
KEGG_ENDOCYTOSIS	-7.67571484222231	2.90139493843321	-5.13176417792693	4.11332525235912	10.1763498017699
KEGG_ENDOMETRIAL_CANCER	-7.95103499041829	-13.648361644523	5.82008783810875	-24.9459364812669	4.06772594147719
KEGG_EPITHELIAL_CELL_SIGNALING_IN_HELICOBACTER_PYLORI_INFECTION	-23.8765201578447	-7.76408277001781	-8.12957527064953	-39.6956880843566	-25.4772887488754
KEGG_ERBB_SIGNALING_PATHWAY	2.20955237914097	5.76099015912746	13.5967942168407	30.6583913645554	10.3873982695477
KEGG_ETHER_LIPID_METABOLISM	-12.4349152014553	-15.0240274090717	-29.4845623227163	-38.5855037273516	-18.196586785921
KEGG_FATTY_ACID_METABOLISM	87.4765911389294	-3.62046164977528	7.66457299782792	43.586356256873	-85.5712567640508
KEGG_FC_EPSILON_RI_SIGNALING_PATHWAY	-10.335398735026	-7.75935438372869	-9.83853380062681	-42.138426427186	-5.40717520520877
KEGG_FC_GAMMA_R_MEDIATED_PHAGOCYTOSIS	-14.7524547818898	-6.24980598185175	-9.45920508191216	-51.0979645768241	4.30159450698238
KEGG_FOCAL_ADHESION	-32.7737640893331	2.31078359337948	-6.14287083711088	-41.8134889979108	13.8494258984904
KEGG_FRUCTOSE_AND_MANNOSE_METABOLISM	11.6643314572054	-17.3419190622253	-23.086461648747	-0.388899438490171	-75.2199032255373
KEGG_GAP_JUNCTION	-24.7313336399222	11.0206846909686	-15.2941190907227	-10.1405116492954	18.3545243222231
KEGG_GLIOMA	-21.1953793234907	-0.47044779180078	3.76982651512139	11.045273153032	-4.29922976332637
KEGG_GLUTATHIONE_METABOLISM	18.6273905594026	-4.79625077157652	-10.6881410495889	-3.86758024910387	-39.5057304986044
KEGG_GLYCEROLIPID_METABOLISM	8.83626112328284	-3.42947058772006	-4.26810727121733	0.238348991124212	-26.1795654728778
KEGG_GLYCEROPHOSPHOLIPID_METABOLISM	13.0300719929879	-6.0928960772668	1.08393553224982	-3.55028473440063	-5.0346490432745
KEGG_GLYCINE_SERINE_AND_THREONINE_METABOLISM	75.3553221430379	3.87967569072964	9.2708731287122	72.0756251666131	-64.0550479193197
KEGG_GLYCOLYSIS_GLUCONEOGENESIS	40.6664168387831	-16.1559988979259	-1.06012280553978	14.8960772682319	-83.2896140272112
KEGG_GLYCOSAMINOGLYCAN_BIOSYNTHESIS_CHONDROITIN_SULFATE	-59.142522704778	1.8663853221891	-17.3187031084105	-29.0112994159929	-2.18349729909687
KEGG_GLYCOSAMINOGLYCAN_BIOSYNTHESIS_HEPARAN_SULFATE	-21.8188145516144	12.5317463534104	18.8523374152062	80.8370828804429	51.8477769626361
KEGG_GLYCOSPHINGOLIPID_BIOSYNTHESIS_LACTO_AND_NEOLACTO_SERIES	17.3112367211365	-25.1437666820862	6.08933729147822	-7.94861484406607	-29.1533884314469
KEGG_GNRH_SIGNALING_PATHWAY	-1.80204180944901	10.8870378921526	7.33224073925794	34.5772650132424	22.2799885029506
KEGG_GRAFT_VERSUS_HOST_DISEASE	-36.8116893319047	-9.3579101373939	-9.26631015407065	-59.5026096746114	-21.2247958471439
KEGG_HEDGEHOG_SIGNALING_PATHWAY	-26.0077852508007	0.95653963110351	-23.5517650339744	-31.436066079702	-15.4052005880457
KEGG_HEMATOPOIETIC_CELL_LINEAGE	-15.4247780147963	-9.34954273943367	-3.48359357416962	-52.4904802128864	5.72168974901592
KEGG_HISTIDINE_METABOLISM	55.6493223954025	-15.3084655235989	-11.8839340073388	-2.29066462029812	-55.5569965822614
KEGG_HUNTINGTONS_DISEASE	-8.63200701173582	-3.1341675369863	-9.37362399567564	-19.4451043902243	10.4287621569501
KEGG_HYPERTROPHIC_CARDIOMYOPATHY_HCM	-24.2715761463969	4.63826358056758	5.50686456653557	-21.4500063258209	48.0528148738653
KEGG_INOSITOL_PHOSPHATE_METABOLISM	15.18691819778	0.808689014359061	16.4997009714566	23.4289343768921	37.4713193386827
KEGG_INSULIN_SIGNALING_PATHWAY	2.56784315098139	3.28824502980206	-4.19446622653527	19.3949946334249	7.17084452156223
KEGG_INTESTINAL_IMMUNE_NETWORK_FOR_IGA_PRODUCTION	-13.3328797333951	-14.569984711222	-1.3478044147904	-58.7097405747224	-11.3009059286462
KEGG_JAK_STAT_SIGNALING_PATHWAY	-8.61769194934118	-6.55546777170139	6.5734630715375	-36.6759121635868	9.17841111884286
KEGG_LEISHMANIA_INFECTION	-29.8200954546869	-12.4148960925743	-7.85806922638471	-69.6663265694017	-3.78767222171814
KEGG_LEUKOCYTE_TRANSENDOTHELIAL_MIGRATION	-21.4454549915702	-17.9684317649035	-22.0972679387098	-74.8331378628134	-5.95420490619949
KEGG_LINOLEIC_ACID_METABOLISM	107.520774695604	-22.6493271747854	45.0659220091902	53.1477166183042	-105.844294635943
KEGG_LONG_TERM_DEPRESSION	-15.6133996296179	4.94658438808584	-10.0257695132101	-11.5281386989829	2.84606858135436
KEGG_LONG_TERM_POTENTIATION	-1.36626078656926	11.5024335020691	9.11455734908273	70.9087131887305	28.0236799998507
KEGG_LYSINE_DEGRADATION	38.3842058261466	-0.784900526276715	-8.28191041195987	28.6777449935362	-58.3489095118059
KEGG_LYSOSOME	-7.10875225397103	-10.8700381295357	-21.4764001536373	-51.0156667052293	-19.0404296652571
KEGG_MAPK_SIGNALING_PATHWAY	-16.9831204480589	3.26679632722175	-1.80962039654253	-6.59272748086005	10.6548076999327
KEGG_MATURITY_ONSET_DIABETES_OF_THE_YOUNG	51.2568914650014	-14.4345530530145	-64.1893772445878	-73.5545968399313	-108.112681486923
KEGG_MELANOGENESIS	-7.07306971227536	9.31072884780551	9.61718023259826	24.7482450774874	14.9032617883734
KEGG_MELANOMA	-20.2976987360687	5.61690572590999	-1.11903621816634	-20.5773273310883	18.4535050359874
KEGG_METABOLISM_OF_XENOBIOTICS_BY_CYTOCHROME_P450	108.604194766903	-19.4064515426188	29.0602266575688	27.223467378226	-130.56940537022
KEGG_MTOR_SIGNALING_PATHWAY	-15.6339049821788	0.153818700165175	-19.0166989667953	-1.58869195290731	17.9080432417027
KEGG_NATURAL_KILLER_CELL_MEDIATED_CYTOTOXICITY	-24.0241100729678	-9.2174921507642	-3.33551702919465	-47.4123722594908	-13.2591160318728
KEGG_NEUROACTIVE_LIGAND_RECEPTOR_INTERACTION	-1.14595853892831	3.57402763886978	9.60759577613305	12.562893439234	18.8571525099707
KEGG_NEUROTROPHIN_SIGNALING_PATHWAY	-15.8332588102477	8.16760195915128	1.73064792037462	27.6351817592363	3.97919882891449
KEGG_NICOTINATE_AND_NICOTINAMIDE_METABOLISM	31.4370358644974	3.28786752574706	14.3826372693898	32.964617632359	17.1794731403825
KEGG_NITROGEN_METABOLISM	51.3261348272249	8.73451108018321	38.8129396928371	74.6946487048135	31.7710614466248
KEGG_NOD_LIKE_RECEPTOR_SIGNALING_PATHWAY	-19.738293150096	-18.7134045874884	29.2448096182654	-76.5939579283897	-19.5953258948387
KEGG_NON_SMALL_CELL_LUNG_CANCER	-7.47101524160576	-4.69738899819777	5.32714926051972	5.33438490475623	-11.0596817964099
KEGG_NOTCH_SIGNALING_PATHWAY	-38.8815984032583	4.43328396248921	-18.9516044879917	-23.6990990933796	-26.3481836382819
KEGG_O_GLYCAN_BIOSYNTHESIS	6.78304918603763	-16.3482498463993	-24.7517591660805	-18.8981900161551	16.1160103777513
KEGG_OLFACTORY_TRANSDUCTION	-7.43764006346782	-0.451028743404777	-14.4161448146435	54.7334175775284	23.035077438738
KEGG_OOCYTE_MEIOSIS	-3.17773847612557	4.43066876757848	-10.7887440395025	66.0774555102646	-1.12890421655675
KEGG_OXIDATIVE_PHOSPHORYLATION	-12.1442192213229	-10.0169578055451	10.7682065987555	-3.36735750939818	15.2503717054196
KEGG_P53_SIGNALING_PATHWAY	-24.8175361106103	-9.64395182548196	-11.6563317994589	-14.8804448459066	-33.2902775027862
KEGG_PANCREATIC_CANCER	-15.3964127116089	-3.80301061105774	1.33230046058202	-6.04228136401866	3.55800990317107
KEGG_PARKINSONS_DISEASE	-31.1951307493956	-2.35823820172448	-14.8869600069356	-52.730553050587	-4.41207070077371
KEGG_PATHOGENIC_ESCHERICHIA_COLI_INFECTION	-33.9153134304361	-12.4964707657587	-32.4145217105693	-70.6146083135786	-41.5450072903104
KEGG_PATHWAYS_IN_CANCER	-24.401897288225	-2.88462479023133	-17.9948078703133	-38.8099806863772	-10.3486330763178
KEGG_PENTOSE_PHOSPHATE_PATHWAY	3.23747055081321	-10.3567409122511	-26.8702612090153	7.089039828762	-76.8487725278885
KEGG_PEROXISOME	81.6558880241923	-0.466033209721445	13.0710241840346	71.4500198765769	-35.1404983856995
KEGG_PHENYLALANINE_METABOLISM	43.1624570858933	-21.0913745021066	-2.47129637503713	2.22236312364953	-76.3720243638504
KEGG_PHOSPHATIDYLINOSITOL_SIGNALING_SYSTEM	18.8284292514518	3.13884638005584	35.5786738419739	48.7170156513953	33.5591903363662
KEGG_PPAR_SIGNALING_PATHWAY	60.9908405950692	-12.8458521649452	32.2869351033409	21.6211016474605	-77.7441280070205
KEGG_PRIMARY_BILE_ACID_BIOSYNTHESIS	88.6601925949341	3.87915706525064	9.53237796850431	43.6838951232497	-64.4379383680613
KEGG_PRIMARY_IMMUNODEFICIENCY	-42.0705330228161	-42.3361213372569	-32.0845941744465	-126.23817515121	-12.7279747232852
KEGG_PRION_DISEASES	21.4914750769956	3.10529558848202	4.07144630909056	-15.9161468879145	-63.1805864862731
KEGG_PROGESTERONE_MEDIATED_OOCYTE_MATURATION	-3.04299954814371	8.90410131617261	-8.85691811540335	39.4516901749342	8.38975430364212
KEGG_PROPANOATE_METABOLISM	42.6823811594754	9.40165998490488	-4.44212732469828	36.2010608260634	-21.1528755805489
KEGG_PROSTATE_CANCER	-20.4107744798648	2.85715150731926	-25.666454677099	2.75245983129935	17.0272770434003
KEGG_PROXIMAL_TUBULE_BICARBONATE_RECLAMATION	0.748291287575853	3.64491643220322	-11.3390797268167	13.4275381698191	-21.247307842045
KEGG_PURINE_METABOLISM	7.56623886154324	11.7003048658494	-12.1594933972215	19.7969176356582	33.301386057696
KEGG_PYRIMIDINE_METABOLISM	18.8744633971385	-7.09347775626338	-20.3451525324515	12.9447178129308	-22.3362743232967
KEGG_PYRUVATE_METABOLISM	32.3508762904139	-8.13219701155367	-0.0358877010380638	17.7830739090762	-31.5834625443135
KEGG_REGULATION_OF_ACTIN_CYTOSKELETON	-14.1094102956786	1.78635063818729	8.72761742312014	-12.7193147897342	20.2412367951738
KEGG_RENAL_CELL_CARCINOMA	-13.4759887369735	1.05524131384072	0.324022261975415	-10.7107347654883	-0.386918204069389
KEGG_RENIN_ANGIOTENSIN_SYSTEM	43.1802447171062	15.5918301405113	-18.5210949274719	-13.7130489351444	0.30622506243509
KEGG_RETINOL_METABOLISM	133.775445006988	-16.630305550624	48.2420430898914	62.410197500181	-158.651434518921
KEGG_RIG_I_LIKE_RECEPTOR_SIGNALING_PATHWAY	-15.623821620133	-8.04632364822169	-6.75603571841316	-18.7135485907986	-21.3774841784127
KEGG_SMALL_CELL_LUNG_CANCER	-19.8656715858108	-1.74266931937086	-1.40546365365935	-28.447873691895	-17.2545587189065
KEGG_SPHINGOLIPID_METABOLISM	-28.3837149349838	-7.18463624518199	-64.1706901989917	-64.0659573554733	-13.9865146431084
KEGG_STARCH_AND_SUCROSE_METABOLISM	68.7063695077413	1.05460209836792	7.93696111479329	45.8151576707025	-20.9759942869389
KEGG_STEROID_HORMONE_BIOSYNTHESIS	103.338561444941	-16.4607568302374	21.6265203134859	3.55924090130287	-107.302026299739
KEGG_SYSTEMIC_LUPUS_ERYTHEMATOSUS	29.9970682583104	-5.08471476114528	9.95185581414592	24.4001014175875	-13.8793868039107
KEGG_T_CELL_RECEPTOR_SIGNALING_PATHWAY	-27.8451368165467	-22.7394343902211	-7.40337316558168	-73.331553083526	-7.67494665660996
KEGG_TASTE_TRANSDUCTION	-12.0363760946593	10.0852991832119	-15.5139773986997	29.5751433397713	3.92015841282409
KEGG_TGF_BETA_SIGNALING_PATHWAY	-14.2820804646708	6.68903573825685	-6.22189170904824	-11.453581075742	5.80085781648245
KEGG_THYROID_CANCER	-14.6426821368586	2.77895769554038	4.94738787615051	-22.7332814604958	5.82173615537613
KEGG_TIGHT_JUNCTION	-17.7622112084778	-9.07181466470524	-27.7711009091424	-45.2493830052495	-23.129406142474
KEGG_TOLL_LIKE_RECEPTOR_SIGNALING_PATHWAY	-15.7832852060485	-16.357468976752	7.60475907077716	-67.9119581269749	-11.87235427886
KEGG_TRYPTOPHAN_METABOLISM	35.3002853918778	-8.93754423330893	-9.36833652665234	-20.5248973377959	-40.8911688168258
KEGG_TYPE_I_DIABETES_MELLITUS	-28.8039010103873	-10.3949316535384	-16.628396155236	-49.5519840568691	-10.7584287855846
KEGG_TYPE_II_DIABETES_MELLITUS	9.30363744635588	2.79355791562551	-5.69323125215811	34.3781610044355	15.2825310831865
KEGG_TYROSINE_METABOLISM	87.6309771790231	-13.0147881007866	33.6925642548727	44.2928054465003	-81.3550010677008
KEGG_UBIQUITIN_MEDIATED_PROTEOLYSIS	-10.8714067862265	-5.1946642759774	-22.7809808172944	9.49623224068546	-14.3748248635898
KEGG_VALINE_LEUCINE_AND_ISOLEUCINE_DEGRADATION	49.0594027826867	-0.63925712950936	5.97627191323727	39.2603354340868	-23.9074978286883
KEGG_VASCULAR_SMOOTH_MUSCLE_CONTRACTION	-1.4318639711571	10.5534173912436	4.12546732936369	-1.52420391670194	28.2015943756692
KEGG_VASOPRESSIN_REGULATED_WATER_REABSORPTION	0.0515572574486214	1.10287046200301	-10.2409272279681	-0.715208715847439	-1.72575476433826
KEGG_VEGF_SIGNALING_PATHWAY	-23.0176010651624	-8.71201565469426	-20.2587896042319	-49.8137064024334	-12.6727627417681
KEGG_VIBRIO_CHOLERAE_INFECTION	10.5603187798049	0.415161794594951	6.59125877858196	19.3226918544999	15.2171170695369
KEGG_VIRAL_MYOCARDITIS	-34.3572081375785	-11.8662239691084	-10.1446190739425	-69.980628049218	-11.8469608941225
KEGG_WNT_SIGNALING_PATHWAY	-36.6141266481987	3.43842073884821	-10.5831012884357	-34.7963244598852	1.03826239741068
